# Supplementary material
Source: PubMed Central journal article supplement (PMC11131612)
Supplement: 18_2008_8473_MOESM3_ESM.pdf [file 18_2008_8473_MOESM3_ESM.pdf]

### Analysis of the MSA47 (human TFPDs)

Attention the  $I_e$  with smaller than 25% AA column occupancy were not included in the  $I_e$  graph (AA marked with \*)

| #MSA   | #Seq   | $I_e$ | Seq | Tot-AA |
|--------|--------|-------|-----|--------|
| 1.000  | 1.000  | 2.205 | Q   | 47     |
| 2.000  | 2.000  | 3.265 | L   | 47     |
| 3.000  | 3.000  | 0.000 | C   | 47     |
| 4.000  | 4.000  | 3.046 | K   | 47     |
| 5.000  | 5.000  | 3.312 | F   | 38     |
| 13.000 | 6.000  | 0.881 | C   | 47     |
| 14.000 | 7.000  | 3.710 | D   | 45     |
| 15.000 | 8.000  | 3.553 | V   | 46     |
| 16.000 | 9.000  | 3.897 | R   | 45     |
| 17.000 | 10.000 | 3.764 | F   | 43     |
| 18.000 | 11.000 | 3.651 | S   | 38     |
| 19.000 | 12.000 | 3.511 | T   | 35     |
| 20.000 | 13.000 | 3.523 | C   | 30     |
| 21.000 | 14.000 | 3.133 | D   | 23     |
| 22.000 | 15.000 | 2.252 | N*  | 6      |
| 23.000 | 16.000 | 1.585 | Q*  | 3      |
| 24.000 | 17.000 | 1.585 | K*  | 3      |
| 25.000 | 18.000 | 1.585 | S*  | 3      |
| 26.000 | 19.000 | 1.792 | C*  | 6      |
| 27.000 | 20.000 | 1.922 | M*  | 5      |
| 28.000 | 21.000 | 2.252 | S*  | 6      |
| 29.000 | 22.000 | 1.585 | N*  | 3      |
| 30.000 | 23.000 | 0.838 | C   | 47     |
| 31.000 | 24.000 | 3.945 | S   | 47     |
| 32.000 | 25.000 | 3.757 | I   | 46     |
| 33.000 | 26.000 | 3.427 | T   | 47     |
| 34.000 | 27.000 | 3.790 | S   | 47     |
| 35.000 | 28.000 | 3.731 | I   | 40     |
| 40.000 | 29.000 | 0.000 | C   | 47     |
| 41.000 | 30.000 | 3.672 | E   | 47     |
| 42.000 | 31.000 | 3.706 | K   | 47     |
| 43.000 | 32.000 | 3.397 | P   | 47     |
| 44.000 | 33.000 | 3.744 | Q   | 45     |
| 45.000 | 34.000 | 2.951 | E   | 21     |
| 50.000 | 35.000 | 3.511 | V   | 47     |
| 51.000 | 36.000 | 0.000 | C   | 47     |
| 52.000 | 37.000 | 3.489 | V   | 47     |
| 53.000 | 38.000 | 2.911 | A   | 47     |
| 54.000 | 39.000 | 3.197 | V   | 47     |
| 55.000 | 40.000 | 3.336 | W   | 47     |
| 56.000 | 41.000 | 3.583 | R   | 46     |
| 57.000 | 42.000 | 3.771 | K   | 47     |
| 58.000 | 43.000 | 3.916 | N   | 47     |
| 59.000 | 44.000 | 3.688 | D   | 47     |
| 60.000 | 45.000 | 3.521 | E   | 47     |
| 61.000 | 46.000 | 3.455 | N   | 44     |
| 70.000 | 47.000 | 3.715 | I   | 45     |
| 71.000 | 48.000 | 3.303 | T   | 45     |
| 72.000 | 49.000 | 3.243 | L   | 45     |
| 73.000 | 50.000 | 3.510 | E   | 46     |
| 74.000 | 51.000 | 2.573 | T   | 46     |
| 75.000 | 52.000 | 2.650 | V   | 44     |

|         |        |       |    |    |
|---------|--------|-------|----|----|
| 76.000  | 53.000 | 0.000 | C  | 47 |
| 77.000  | 54.000 | 3.685 | H  | 47 |
| 78.000  | 55.000 | 3.548 | D  | 47 |
| 79.000  | 56.000 | 3.627 | P  | 47 |
| 80.000  | 57.000 | 3.231 | K  | 22 |
| 81.000  | 58.000 | 2.557 | L  | 14 |
| 82.000  | 59.000 | 2.664 | P* | 11 |
| 83.000  | 60.000 | 2.750 | Y* | 8  |
| 84.000  | 61.000 | 2.252 | H* | 6  |
| 85.000  | 62.000 | 2.585 | D* | 6  |
| 86.000  | 63.000 | 2.322 | F* | 5  |
| 87.000  | 64.000 | 1.585 | I* | 3  |
| 88.000  | 65.000 | 1.000 | L* | 2  |
| 89.000  | 66.000 | 0.000 | E* | 1  |
| 90.000  | 67.000 | 0.000 | D* | 1  |
| 91.000  | 68.000 | 0.000 | A* | 1  |
| 92.000  | 69.000 | 2.807 | A* | 7  |
| 93.000  | 70.000 | 2.626 | S  | 12 |
| 94.000  | 71.000 | 3.484 | P  | 20 |
| 95.000  | 72.000 | 3.986 | K  | 27 |
| 96.000  | 73.000 | 0.590 | C  | 47 |
| 97.000  | 74.000 | 3.833 | I  | 47 |
| 98.000  | 75.000 | 3.693 | M  | 47 |
| 99.000  | 76.000 | 3.478 | K  | 46 |
| 100.000 | 77.000 | 3.600 | E  | 45 |
| 101.000 | 78.000 | 3.990 | K  | 43 |
| 114.000 | 79.000 | 3.863 | K  | 38 |
| 115.000 | 80.000 | 3.367 | K  | 39 |
| 116.000 | 81.000 | 3.886 | P  | 42 |
| 117.000 | 82.000 | 3.342 | G  | 43 |
| 118.000 | 83.000 | 3.766 | E  | 45 |
| 119.000 | 84.000 | 3.612 | T  | 46 |
| 120.000 | 85.000 | 3.362 | F  | 47 |
| 121.000 | 86.000 | 3.714 | F  | 47 |
| 122.000 | 87.000 | 3.348 | M  | 47 |
| 123.000 | 88.000 | 3.631 | C  | 47 |
| 124.000 | 89.000 | 0.809 | S  | 46 |
| 125.000 | 90.000 | 0.000 | C  | 47 |
| 126.000 | 91.000 | 3.317 | S  | 46 |
| 128.000 | 92.000 | 3.167 | S  | 46 |
| 129.000 | 93.000 | 2.536 | D  | 47 |
| 130.000 | 94.000 | 2.757 | E  | 47 |
| 131.000 | 95.000 | 0.000 | C  | 47 |
| 132.000 | 96.000 | 0.000 | N  | 47 |
| 133.000 | 97.000 | 3.789 | D  | 47 |
