# Supplementary material
Source: PubMed Central journal article supplement (PMC11131612)
Supplement: 18_2008_8473_MOESM4_ESM.pdf [file 18_2008_8473_MOESM4_ESM.pdf]

**Table 1S.** Data computed from the MSA containing 47 sequences of human TFPDs.

| Case | AA-residues             | Conservation/Divergence/Similarity |      |      | Comments        |
|------|-------------------------|------------------------------------|------|------|-----------------|
| 1    | L,C,K(50-52)            | 0.61                               | 0.55 | 0.64 | β-strand 1 (F1) |
| 2    | T,S,I,C(74-77)          | 0.53                               | 0.60 | 0.51 | β-strand 2 (F1) |
| 3    | V,C,V,A,V,W,R,K(83-90)  | 0.50                               | 0.56 | 0.34 | β-strand 3 (F2) |
| 4    | I,T,L,E,T,V,C,H(95-102) | 0.51                               | 0.53 | 0.32 | β-strand 4 (F2) |
| 4    | C,I,M,K,E(121-126)      | 0.48                               | 0.65 | 0.44 | β-strand 5 (F3) |
| 5    | T,F,F,M,C,S,C(131-138)  | 0.55                               | 0.51 | 0.45 | β-strand 6 (F3) |
| 6    | C,S,S,D,E,C,N(138-144)  | 0.70                               | 0.38 | 0.47 | C-terminal      |
| 7    | C51                     | 1.00                               |      |      | Cys-1 (Db1)     |
| 8    | C54                     | 0.82                               |      |      | Cys-1 (Db1a)    |
| 9    | C71                     | 0.82                               |      |      | Cys-2 (Db1a)    |
| 8    | C77                     | 1.00                               |      |      | Cys-1 (Db2)     |
| 9    | C84                     | 1.00                               |      |      | Cys-2 (Db1)     |
| 10   | C101                    | 1.00                               |      |      | Cys-2 (Db2)     |
| 11   | C121                    | 1.00                               |      |      | Cys-1 (Db3)     |
| 12   | C136                    | 0.88                               |      |      | Cys-2 (Db3)     |
| 13   | C138                    | 0.77                               |      |      | Cys-1 (Db4)     |
| 14   | C143                    | 1.00                               |      |      | Cys-2 (Db4)     |
| 15   | C143,N144               | 1.00                               |      |      | C-terminal CN   |

The sequence conservation was calculated using the sequence of NP\_003233, (TGF-beta type II receptor isoform B precursor, Homo sapiens) as reference and the Blosum30 matrix. Divergence and similarity scores were calculated using the AAC derived from the human genome database containing 28243 entries.

Magenta - signal sequence, in yellow are the Cys residues in the TFPD, whereas in cyan are β-strands established in the structures of 1M9Z.

```

123456789012345678901234567890123456789012345678901234567890123456789012345678901234567
  10      20      30      40      50      60      70      80      90
MGRGLRGLWPLHIVLWTRIASTIPPHVQKSVNNDMIVTDNNGAVKFPQLCKFCDDVRFSTCDNQKSCMSNCSITSICEKQEVCVAVWRKNDENITLETVCHDPKLPYHDFILEDA
ASPKCIMKEKKKPGETTFFMCSCSSDECNDNIIFSEEYNTSNPDLLLVIFQVTGISLLPPLGVAISVIIIIFYCYRVNRQQLSSTWETGKTRKLMFSEHCAIILEDRSDISSTCA
NNINHNTELLPIELDTLVGKGRFAEVYKAKLKQNTSEQFETVAVKIFPYEYASWKTEKDIFSDINLKHENILQFLTABERKTELGKQYWLITAFHAKGNLQEYLTRHVISWEDLR
KLGSSSLARGIAHLHSDHTPCGRPKMPIVHRDLKSSNILVKNDLTCCLCDFGLSLRLDPTLSVDDLANSGQVGTARYMAPEVLESRMNLENVESFKQTDVYSMALVLWEMTSRCNAV
GEVKDYEPFPGSKVREHPCVESMKDNVLRDRGRPEIPSFWLNHQGIQMVCETLTECWDHDPPEARLTAQCVAERFSELEHLDRLSGRSCSEEKIPEDGSLNTTK*

```
