# Supplementary material
Source: PubMed Central journal article supplement (PMC11131612)
Supplement: 18_2008_8473_MOESM5_ESM.pdf [file 18_2008_8473_MOESM5_ESM.pdf]

**Table 2S.** Data computed from the MSA containing 310 sequences of diverse TFPs.

| Case | Residues                          | Conservation/Divergence/Similarity |      |      | Comments               |
|------|-----------------------------------|------------------------------------|------|------|------------------------|
| 1    | L1, E2, C3, H4                    | 0.65                               | 0.51 | 0.54 | $\beta$ -strand 1 (F1) |
| 2    | T14, K15, T16, C17                | 0.64                               | 0.51 | 0.55 | $\beta$ -strand 2 (F1) |
| 3    | C23, Y24, K25, K26, V27, W28, R29 | 0.54                               | 0.56 | 0.42 | $\beta$ -strand 3 (F2) |
| 4    | I35, I36, E37, R38, G39, C40      | 0.60                               | 0.50 | 0.40 | $\beta$ -strand 4 (F2) |
| 5    | K50, L51, N52, C53, C54           | 0.68                               | 0.42 | 0.56 | $\beta$ -strand 5 (F3) |
| 6    | D57, K58, C59, N60, N61           | 0.74                               | 0.32 | 0.53 | C-terminal             |
| 7    | C3                                | 1.00                               |      |      | Cys-1 (Db1)            |
| 8    | C17                               | 0.99                               |      |      | Cys-1 (Db2)            |
| 9    | C23                               | 0.99                               |      |      | Cys-2 (Db1)            |
| 10   | C40                               | 0.98                               |      |      | Cys-2 (Db2)            |
| 11   | C42                               | 0.96                               |      |      | Cys-1 (Db3)            |
| 12   | C53                               | 0.95                               |      |      | Cys-2 (Db3)            |
| 13   | C54                               | 0.99                               |      |      | Cys-1 (Db4)            |
| 14   | C59                               | 1.00                               |      |      | Cys-2 (Db4)            |
| 15   | C59, N60                          | 0.98                               |      |      | C-terminal CN          |

The sequence conservation was calculated using the sequence of P01426 (short neurotoxin from *Naja nigricollis*) as reference and the Blosum30 matrix. Divergence and similarity scores were calculated using the AAC derived from the human genome database containing 28243 entries.
