# Supplementary material
Source: PubMed Central journal article supplement (PMC11131612)

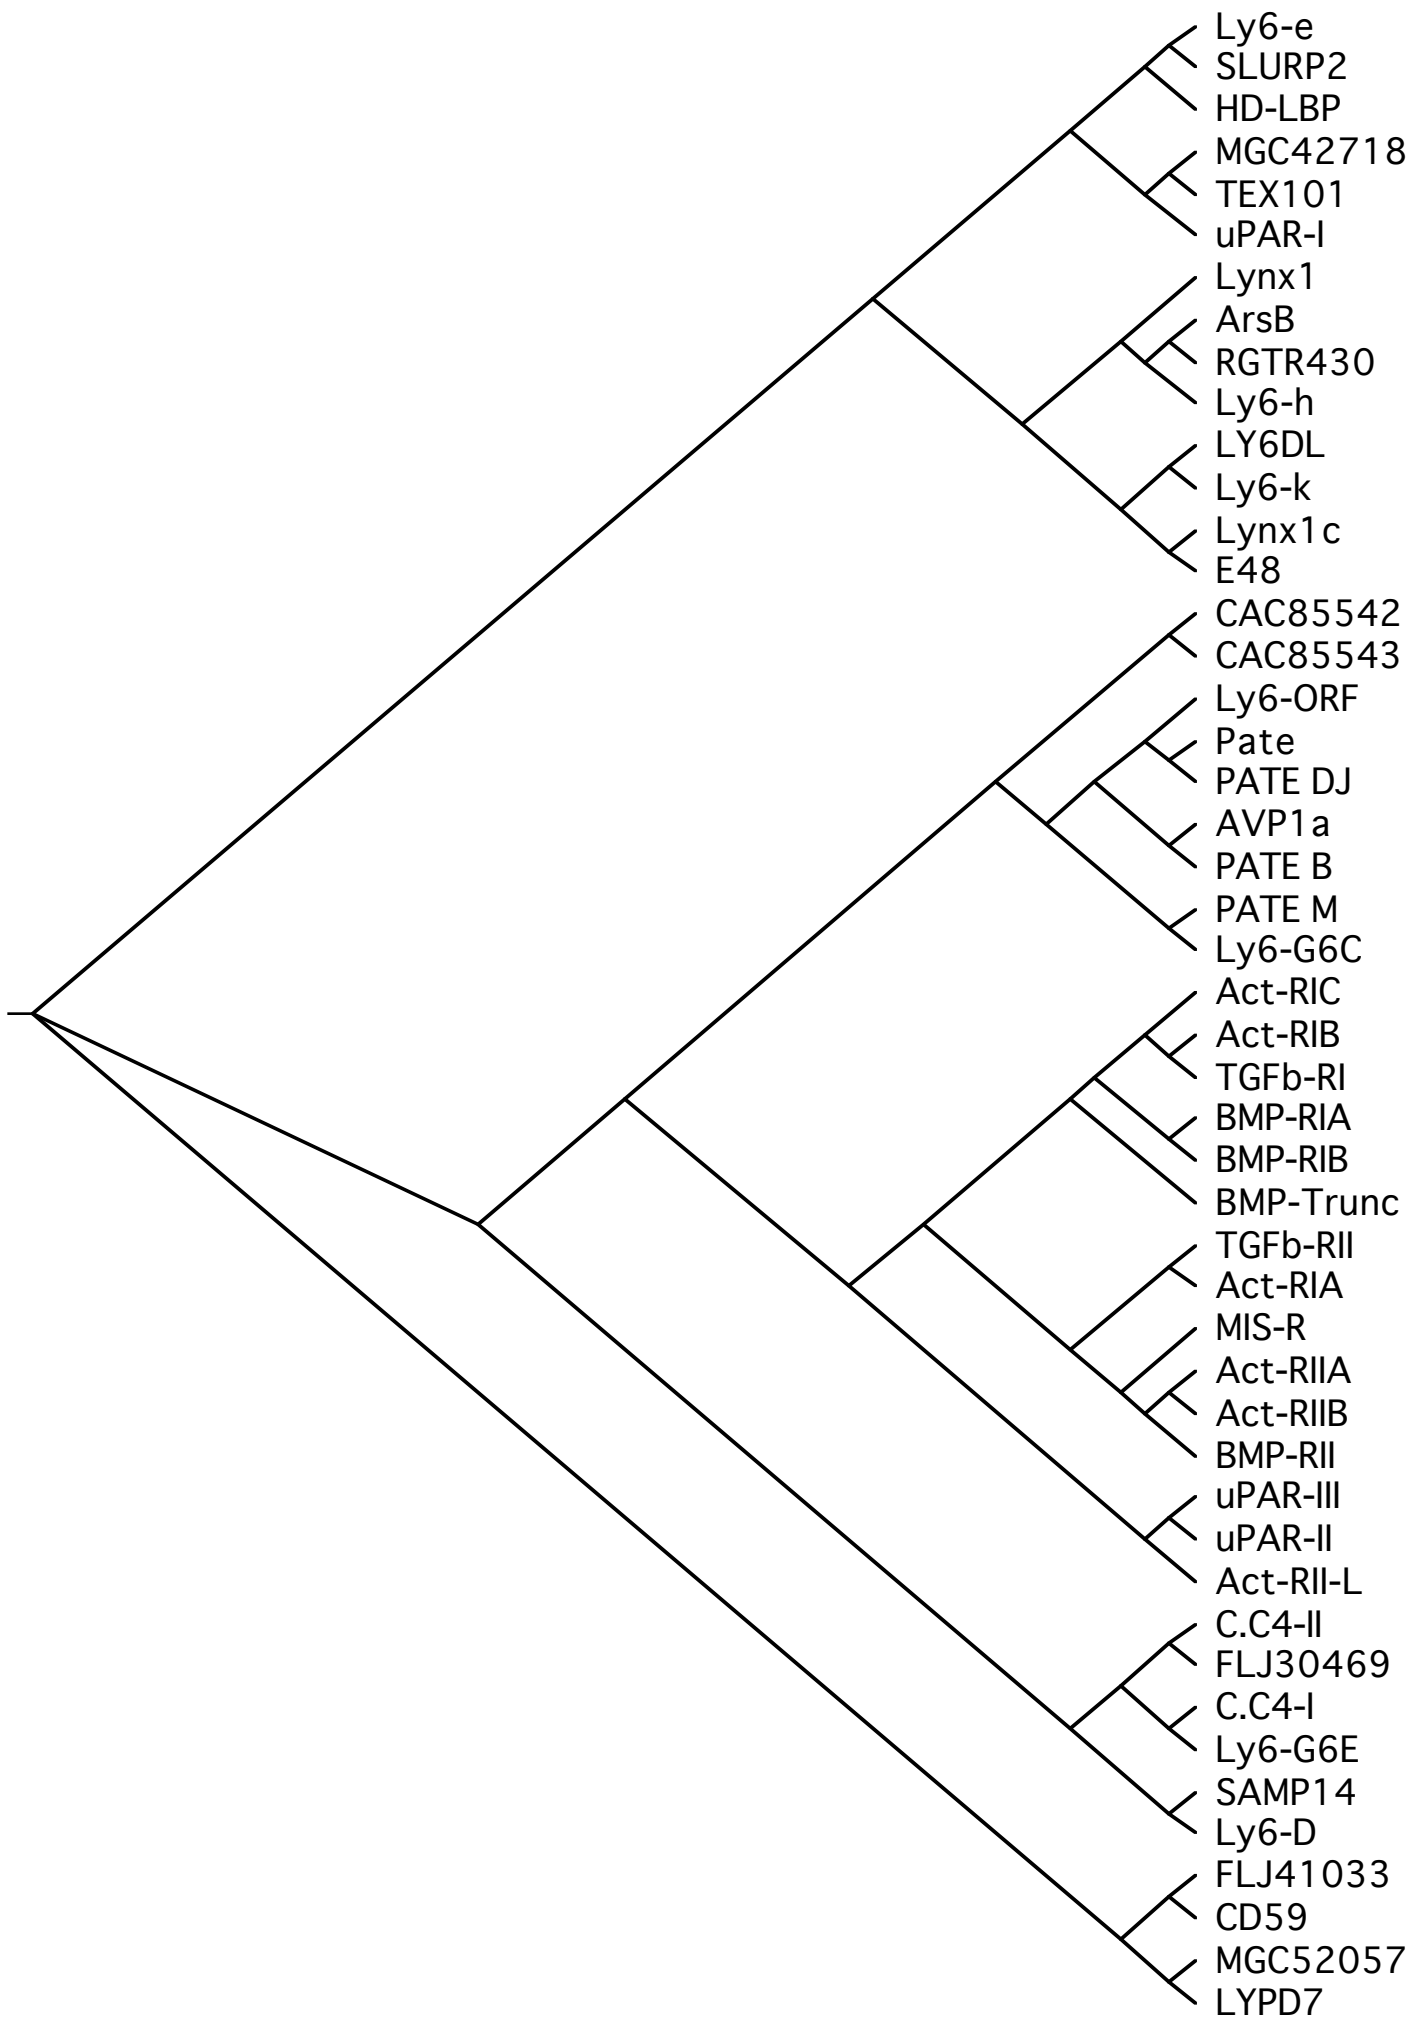

Supplement: 18_2008_8473_MOESM1_ESM.pdf [file 18_2008_8473_MOESM1_ESM.pdf]

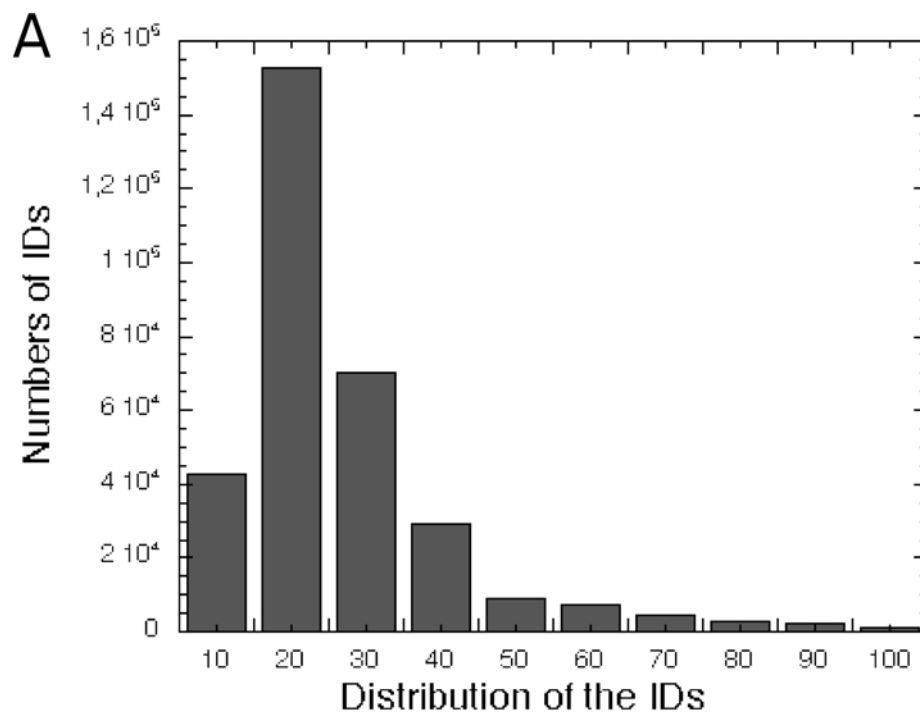

**B** *Alignment of 802 sequences of TFPDs*

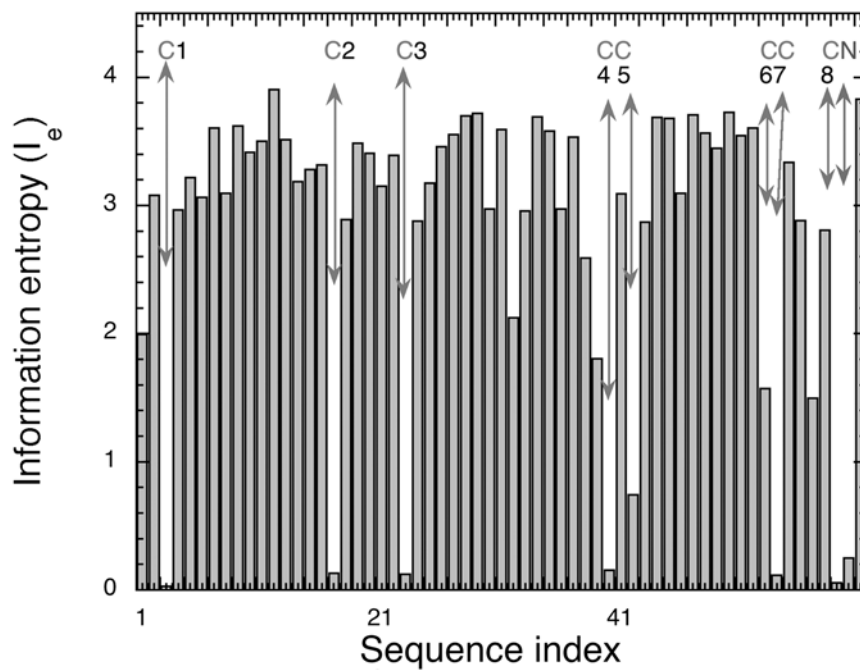

Supplement: 18_2008_8473_MOESM2_ESM.pdf [file 18_2008_8473_MOESM2_ESM.pdf]
